# Supplementary figures and images for: Adenoviral vaccines promote protective tissue-resident memory T cell populations against cancer
Source: HighWire-hosted journal article supplement (doi:10.1136/jitc-2020-001133), 2020-12-01

Van der Gracht *et al.* | Fig. S5.

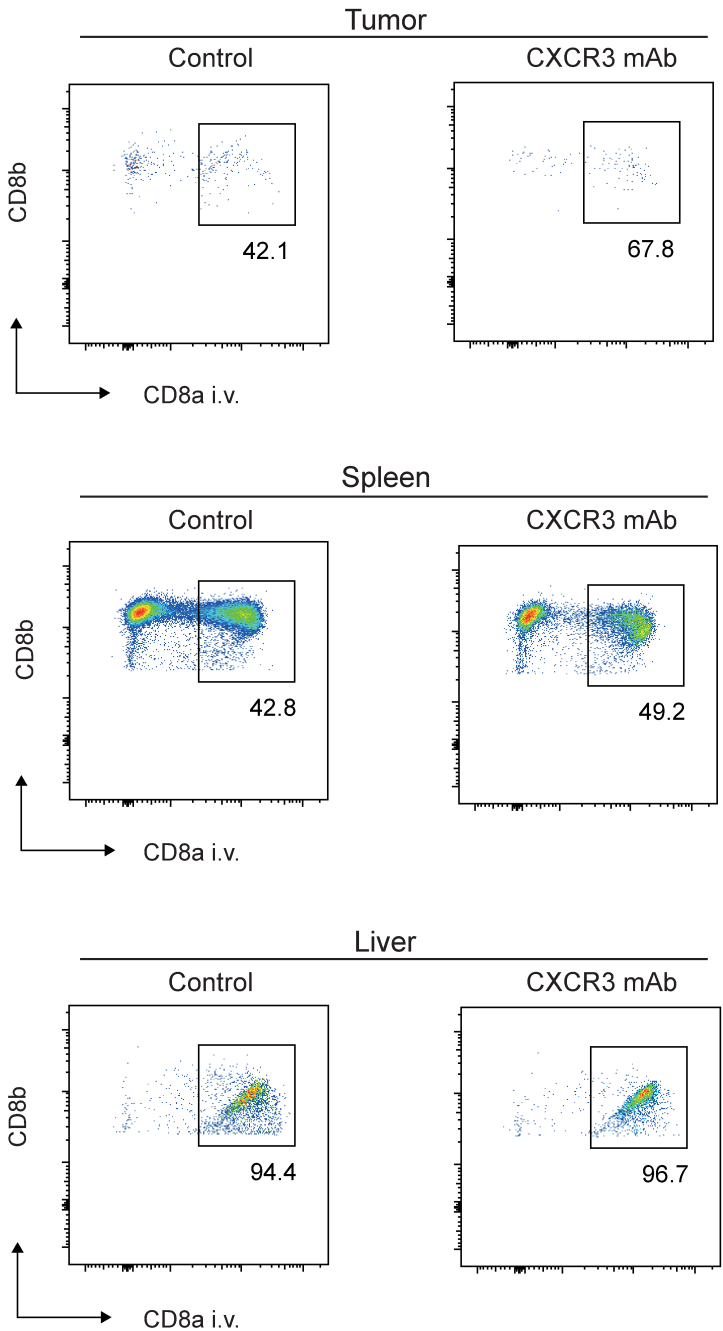

Supplement: jitc-2020-001133supp005_data_supplement.pdf [file jitc-2020-001133supp005_data_supplement.pdf]
